# Supplementary material for: The SAGA/TREX-2 subunit Sus1 binds widely to transcribed genes and affects mRNA turnover globally
Source: Springer Nature journal article supplement (doi:10.1186/s13072-018-0184-2), 2018-03-29

**Fig. S1**

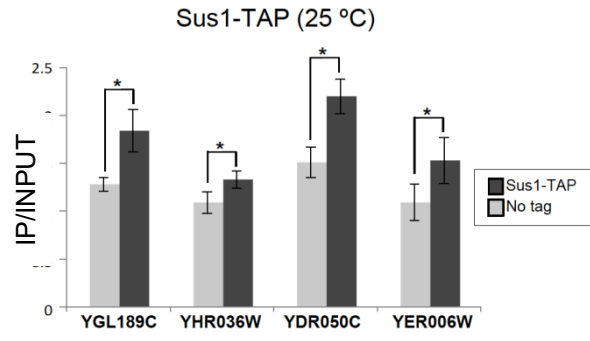

Supplement: MOESM1 [file 13072_2018_184_MOESM1_ESM.pdf]
