# Supplementary material for: The SAGA/TREX-2 subunit Sus1 binds widely to transcribed genes and affects mRNA turnover globally
Source: Springer Nature journal article supplement (doi:10.1186/s13072-018-0184-2), 2018-03-29

Fig. S2

a

Top Sus1 binding GO categories at 25 °C

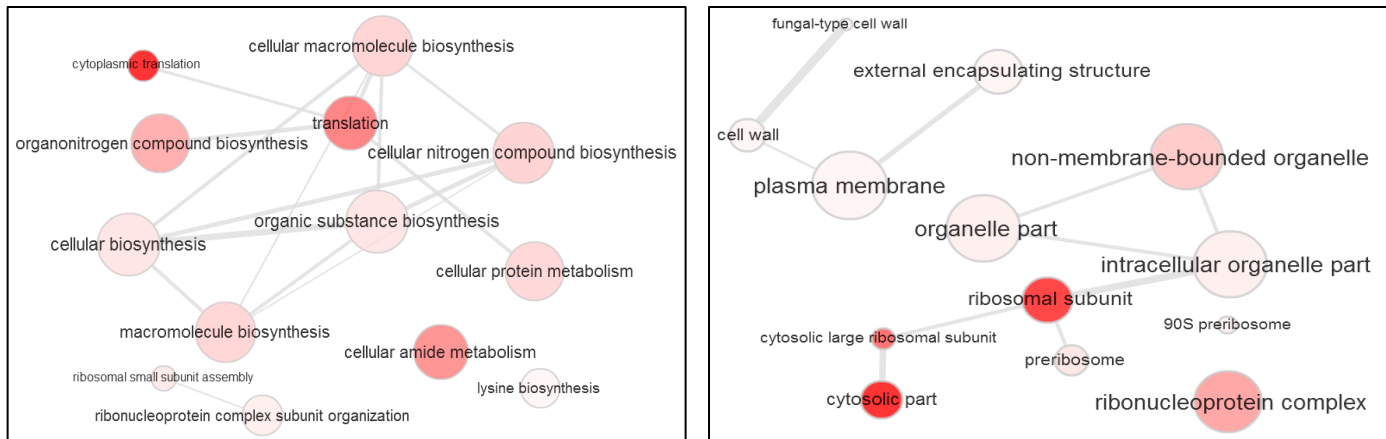

b

Top Sus1 binding GO categories at 37 °C

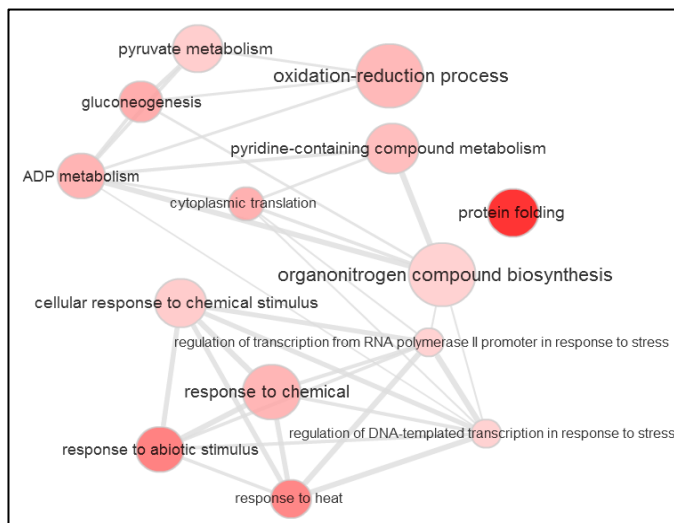

Supplement: MOESM2 [file 13072_2018_184_MOESM2_ESM.pdf]
