# Supplementary material for: The SAGA/TREX-2 subunit Sus1 binds widely to transcribed genes and affects mRNA turnover globally
Source: Springer Nature journal article supplement (doi:10.1186/s13072-018-0184-2), 2018-03-29
Supplement: MOESM3 [file 13072_2018_184_MOESM3_ESM.pdf]

TR ratios (*sus1* $\Delta$ /WT). GO enriched terms

## Top

| Term ID    | Description                                                 | log <sub>10</sub> p-value |
|------------|-------------------------------------------------------------|---------------------------|
| GO:0055114 | oxidation-reduction process                                 | -4.757                    |
| GO:0015980 | energy derivation by oxidation of organic compounds         | -4.281                    |
| GO:0043605 | cellular amide catabolic process                            | -4.162                    |
| GO:0006081 | cellular aldehyde metabolic process                         | -3.572                    |
| GO:0005978 | glycogen biosynthetic process                               | -2.839                    |
| GO:0006091 | generation of precursor metabolites and energy              | -2.697                    |
| GO:0006122 | mitochondrial electron transport, ubiquinol to cytochrome c | -2.423                    |
| GO:0006739 | NADP metabolic process                                      | -2.384                    |

## Bottom

| Term ID    | Description                                                                               | log <sub>10</sub> p-value |
|------------|-------------------------------------------------------------------------------------------|---------------------------|
| GO:0042254 | ribosome biogenesis                                                                       | -19.291                   |
| GO:0006412 | translation                                                                               | -18.636                   |
| GO:0034660 | ncRNA metabolic process                                                                   | -13.854                   |
| GO:0016072 | rRNA metabolic process                                                                    | -13.503                   |
| GO:0006396 | RNA processing                                                                            | -9.815                    |
| GO:0016070 | RNA metabolic process                                                                     | -8.083                    |
| GO:0006913 | nucleocytoplasmic transport                                                               | -7.443                    |
| GO:0051169 | nuclear transport                                                                         | -7.443                    |
| GO:0071166 | ribonucleoprotein complex localization                                                    | -6.654                    |
| GO:0033750 | ribosome localization                                                                     | -6.382                    |
| GO:0000466 | maturation of 5.8S rRNA from tricistronic rRNA transcript (SSU-rRNA, 5.8S rRNA, LSU-rRNA) | -5.587                    |
| GO:0090501 | RNA phosphodiester bond hydrolysis                                                        | -5.349                    |
| GO:0000469 | cleavage involved in rRNA processing                                                      | -5.349                    |
| GO:0000478 | endonucleolytic cleavage involved in rRNA processing                                      | -4.719                    |
| GO:0044085 | cellular component biogenesis                                                             | -4.684                    |
| GO:0015931 | nucleobase-containing compound transport                                                  | -4.151                    |
| GO:0051640 | organelle localization                                                                    | -4.086                    |
| GO:0051028 | mRNA transport                                                                            | -4.031                    |
| GO:0006403 | RNA localization                                                                          | -3.975                    |
| GO:0016482 | cytosolic transport                                                                       | -3.336                    |
