# Supplementary material for: The SAGA/TREX-2 subunit Sus1 binds widely to transcribed genes and affects mRNA turnover globally
Source: Springer Nature journal article supplement (doi:10.1186/s13072-018-0184-2), 2018-03-29
Supplement: MOESM4 [file 13072_2018_184_MOESM4_ESM.pdf]

**HL ratios (*sus1*Δ/WT). GO enriched terms**

**Top**

| <b>Term ID</b> | <b>Description</b>                                                                        | <b>log<sub>10</sub> p-value</b> |
|----------------|-------------------------------------------------------------------------------------------|---------------------------------|
| GO:0042254     | ribosome biogenesis                                                                       | -17.519                         |
| GO:0016072     | rRNA metabolic process                                                                    | -14.010                         |
| GO:0006396     | RNA processing                                                                            | -11.614                         |
| GO:0034660     | ncRNA metabolic process                                                                   | -11.545                         |
| GO:0006412     | translation                                                                               | -9.165                          |
| GO:0016070     | RNA metabolic process                                                                     | -7.027                          |
| GO:0071166     | ribonucleoprotein complex localization                                                    | -5.996                          |
| GO:0000466     | maturation of 5.8S rRNA from tricistronic rRNA transcript (SSU-rRNA, 5.8S rRNA, LSU-rRNA) | -5.851                          |
| GO:0090501     | RNA phosphodiester bond hydrolysis                                                        | -5.836                          |
| GO:0033750     | ribosome localization                                                                     | -5.680                          |
| GO:0006913     | nucleocytoplasmic transport                                                               | -5.457                          |
| GO:0051169     | nuclear transport                                                                         | -5.457                          |
| GO:0000478     | endonucleolytic cleavage involved in rRNA processing                                      | -4.839                          |
| GO:0044085     | cellular component biogenesis                                                             | -4.599                          |
| GO:0000967     | rRNA 5'-end processing                                                                    | -3.807                          |
| GO:0007049     | cell cycle                                                                                | -3.635                          |
| GO:0031023     | microtubule organizing center organization                                                | -3.585                          |
| GO:0051300     | spindle pole body organization                                                            | -3.585                          |

**Bottom**

| <b>Term ID</b> | <b>Description</b>                                  | <b>log<sub>10</sub> p-value</b> |
|----------------|-----------------------------------------------------|---------------------------------|
| GO:0055114     | oxidation-reduction process                         | -5.060                          |
| GO:0046496     | nicotinamide nucleotide metabolic process           | -4.788                          |
| GO:0072524     | pyridine-containing compound metabolic process      | -4.350                          |
| GO:0051186     | cofactor metabolic process                          | -4.150                          |
| GO:0005978     | glycogen biosynthetic process                       | -4.104                          |
| GO:0006740     | NADPH regeneration                                  | -4.080                          |
| GO:0019321     | pentose metabolic process                           | -3.747                          |
| GO:0015980     | energy derivation by oxidation of organic compounds | -3.638                          |
| GO:0016052     | carbohydrate catabolic process                      | -3.431                          |
| GO:0005975     | carbohydrate metabolic process                      | -3.179                          |
| GO:0006091     | generation of precursor metabolites and energy      | -3.130                          |
| GO:0044723     | single-organism carbohydrate metabolic process      | -2.996                          |
| GO:0016051     | carbohydrate biosynthetic process                   | -2.987                          |
| GO:0006116     | NADH oxidation                                      | -2.917                          |
| GO:0044281     | small molecule metabolic process                    | -2.879                          |
| GO:0006508     | proteolysis                                         | -2.796                          |
| GO:0006528     | asparagine metabolic process                        | -2.629                          |
| GO:0009056     | catabolic process                                   | -2.594                          |
