# Supplementary material for: The SAGA/TREX-2 subunit Sus1 binds widely to transcribed genes and affects mRNA turnover globally
Source: Springer Nature journal article supplement (doi:10.1186/s13072-018-0184-2), 2018-03-29
Supplement: MOESM5 [file 13072_2018_184_MOESM5_ESM.pdf]

**Supplemental Table S1. Strains used in this study.**

| <b>Yeast strain</b>          | <b>Genotype</b>                                                                          | <b>Genotype reference</b>    |
|------------------------------|------------------------------------------------------------------------------------------|------------------------------|
| BY4741                       | <i>Mat a, leu2-Δ0, his3-Δ1, met15-Δ0, ura3-Δ0</i>                                        | Euroscarf                    |
| <i>sus1Δ</i>                 | <i>Mat a, leu2-Δ0, his3-Δ1, met15-Δ0, ura3-Δ0<br/>sus1::KANMX4</i>                       | This study                   |
| SUS1-TAP                     | <i>Mat a, leu2-Δ0, his3-Δ1, met15-Δ0,<br/>SUS1-TAP::URA3</i>                             | This study                   |
| SUS1-MYC                     | <i>Mat a, leu2-Δ0, his3-Δ1, met15-Δ0, ura3-Δ0,<br/>SUS1-MYC::HIS3</i>                    | Pascual-García et al. (2008) |
| SUS1-MYC<br><i>spt8Δ</i>     | <i>Mat a, leu2-Δ0, his3-Δ1, met15-Δ0, ura3-Δ0,<br/>SUS1-MYC::HIS3, spt8::KanMX4</i>      | This study                   |
| SUS1-MYC<br><i>spt7-1180</i> | <i>Mat a, leu2-Δ0, his3-Δ1, met15-Δ0, ura3-Δ0,<br/>SUS1-MYC::HIS3, spt7-1180::KanMX4</i> | This study                   |
