# Supplementary material for: The SAGA/TREX-2 subunit Sus1 binds widely to transcribed genes and affects mRNA turnover globally
Source: Springer Nature journal article supplement (doi:10.1186/s13072-018-0184-2), 2018-03-29
Supplement: MOESM6 [file 13072_2018_184_MOESM6_ESM.pdf]

**Supplemental Table S2. Primers for ChIP analysis and RT-qPCR.**

| <b>Amplified region</b>             | <b>Oligo name</b> | <b>Oligo sequence</b>    |
|-------------------------------------|-------------------|--------------------------|
| Intergenic region<br>(chromosome V) | <i>IntV</i> -UP   | TGTTCCTTTAAGAGGTGATGGTGA |
|                                     | <i>IntV</i> -DW   | GTGCGCAGTACTTGTGAAAACC   |
| <i>ACT1</i>                         | <i>ACT1</i> -UP   | GTTTTGGATTCCGGTGATGG     |
|                                     | <i>ACT1</i> -DW   | AATCTCTACCGGCCAAATCG     |
| YGL189C ORF                         | YGL189C-UP        | CGCTTTGCCAAAGACTTACAAC   |
|                                     | YGL189C-DW        | CTTCTTGCGGCATCAGCA       |
| YHR036W ORF                         | YHR036W-UP        | CGTTGACGAGGAGTTAGGAGG    |
|                                     | YHR036W-DW        | CCTCATCAGCTTTAGCAGCAC    |
| YDR050C ORF                         | YDR050C-UP        | GTCAAGGTGTCGGTGTCATC     |
|                                     | YDR050C-DW        | GACTGGTTCGTAAGCGACAAC    |
| YER006W ORF                         | YER006W-UP        | GGTATTCAAATCTTGCCAGTG    |
|                                     | YER006W-DW        | GCAATTGGAGCTTGTTTAGTGC   |
